# Supplementary material
Source: MDPI journal article supplement (https://www.mdpi.com/1999-4907/13/5/769)

**Table S1.** Treethrow density and treethrow depth. a) Totally decomposed, b)Partially decomposed and c) Fresh treethrow.  
a)

| ID | Treethrow<br>density | Depth |
|----|----------------------|-------|
| 4  | 26                   | 0     |
| 6  | 158                  | 20    |
| 7  | 105                  | 40    |
| 8  | 53                   | 25    |
| 15 | 79                   | 10    |
| 16 | 79                   | 20    |
| 17 | 132                  | 15    |
| 18 | 158                  | 20    |
| 19 | 105                  | 10    |
| 20 | 132                  | 20    |
| 21 | 105                  | 10    |
| 22 | 132                  | 15    |
| 25 | 26                   | 20    |
| 26 | 26                   | 0     |
| 27 | 26                   | 20    |
| 28 | 53                   | 20    |
| 30 | 53                   | 15    |
| 31 | 53                   | 15    |
| 32 | 53                   | 20    |
| 33 | 79                   | 15    |
| 34 | 184                  | 20    |
| 37 | 132                  | 15    |
| 39 | 132                  | 30    |
| 40 | 53                   | 20    |

|    |     |    |
|----|-----|----|
| 41 | 79  | 20 |
| 42 | 53  | 25 |
| 43 | 26  | 25 |
| 44 | 26  | 30 |
| 45 | 26  | 65 |
| 46 | 26  | 20 |
| 47 | 26  | 20 |
| 48 | 79  | 0  |
| 49 | 79  | 10 |
| 50 | 53  | 20 |
| 53 | 184 | 0  |
| 54 | 132 | 20 |
| 55 | 26  | 15 |
| 57 | 211 | 0  |
| 58 | 53  | 40 |
| 60 | 26  | 20 |
| 62 | 105 | 20 |
| 63 | 26  | 40 |
| 64 | 53  | 15 |
| 66 | 132 | 20 |
| 67 | 79  | 30 |
| 68 | 26  | 25 |
| 69 | 132 | 20 |
| 70 | 132 | 35 |
| 71 | 184 | 30 |
| 72 | 132 | 20 |
| 74 | 53  | 15 |
| 77 | 53  | 15 |

|     |     |    |
|-----|-----|----|
| 78  | 53  | 0  |
| 79  | 26  | 0  |
| 82  | 26  | 0  |
| 83  | 26  | 0  |
| 85  | 26  | 0  |
| 86  | 79  | 0  |
| 87  | 79  | 25 |
| 89  | 105 | 20 |
| 90  | 184 | 40 |
| 91  | 105 | 30 |
| 92  | 53  | 30 |
| 93  | 53  | 25 |
| 94  | 53  | 20 |
| 95  | 158 | 10 |
| 96  | 26  | 30 |
| 97  | 26  | 20 |
| 100 | 26  | 20 |
| 101 | 26  | 20 |
| 102 | 79  | 40 |
| 104 | 26  | 35 |
| 105 | 26  | 15 |
| 106 | 105 | 0  |
| 107 | 53  | 20 |
| 108 | 211 | 15 |
| 109 | 53  | 15 |
| 110 | 158 | 20 |
| 111 | 79  | 40 |
| 112 | 237 | 20 |

|     |     |    |
|-----|-----|----|
| 113 | 132 | 30 |
| 114 | 26  | 50 |
| 115 | 158 | 20 |
| 116 | 132 | 20 |
| 117 | 158 | 30 |
| 118 | 105 | 25 |
| 119 | 105 | 35 |
| 120 | 53  | 20 |
| 121 | 53  | 30 |
| 122 | 79  | 55 |
| 123 | 26  | 0  |
| 124 | 26  | 10 |
| 125 | 79  | 30 |
| 126 | 79  | 20 |
| 127 | 211 | 30 |
| 128 | 132 | 15 |
| 129 | 79  | 15 |
| 130 | 132 | 20 |
| 131 | 184 | 30 |
| 132 | 158 | 30 |
| 133 | 26  | 10 |
| 134 | 79  | 20 |
| 135 | 211 | 20 |
| 136 | 132 | 20 |
| 137 | 211 | 60 |
| 138 | 132 | 25 |
| 139 | 53  | 25 |
| 141 | 79  | 20 |

|     |     |    |
|-----|-----|----|
| 142 | 158 | 35 |
| 143 | 184 | 40 |
| 144 | 26  | 15 |
| 145 | 184 | 40 |
| 147 | 132 | 45 |
| 148 | 132 | 25 |
| 149 | 132 | 30 |
| 150 | 132 | 20 |
| 151 | 105 | 20 |
| 152 | 105 | 20 |
| 153 | 79  | 20 |
| 154 | 158 | 20 |
| 155 | 237 | 30 |
| 156 | 79  | 10 |
| 157 | 79  | 30 |
| 158 | 263 | 30 |
| 159 | 105 | 35 |
| 160 | 132 | 40 |
| 161 | 79  | 20 |
| 162 | 79  | 20 |
| 163 | 132 | 30 |
| 164 | 342 | 35 |
| 165 | 53  | 30 |
| 166 | 26  | 25 |
| 167 | 132 | 30 |
| 168 | 53  | 15 |
| 169 | 132 | 25 |
| 170 | 79  | 20 |

|     |     |    |
|-----|-----|----|
| 171 | 26  | 15 |
| 173 | 263 | 45 |
| 174 | 289 | 25 |
| 175 | 237 | 35 |
| 176 | 289 | 25 |
| 177 | 211 | 25 |
| 178 | 105 | 25 |
| 181 | 79  | 25 |
| 182 | 105 | 25 |
| 183 | 53  | 15 |
| 184 | 53  | 10 |
| 185 | 132 | 15 |
| 187 | 105 | 25 |
| 188 | 26  | 10 |
| 189 | 105 | 20 |
| 190 | 132 | 20 |
| 191 | 132 | 40 |
| 192 | 132 | 20 |
| 194 | 211 | 60 |
| 195 | 237 | 30 |
| 196 | 316 | 25 |
| 197 | 132 | 20 |
| 198 | 237 | 30 |
| 199 | 316 | 25 |
| 203 | 105 | 20 |
| 204 | 105 | 35 |
| 208 | 79  | 15 |
| 209 | 53  | 25 |

|     |     |    |
|-----|-----|----|
| 210 | 105 | 25 |
| 211 | 132 | 25 |
| 215 | 105 | 15 |
| 216 | 316 | 25 |
| 217 | 289 | 30 |
| 218 | 263 | 25 |
| 219 | 132 | 25 |
| 220 | 105 | 30 |
| 224 | 26  | 10 |
| 226 | 53  | 25 |
| 227 | 26  | 0  |
| 229 | 53  | 25 |
| 230 | 105 | 25 |
| 231 | 26  | 10 |
| 232 | 26  | 30 |
| 233 | 26  | 0  |
| 235 | 79  | 20 |
| 236 | 26  | 30 |
| 238 | 105 | 25 |
| 239 | 105 | 10 |
| 240 | 26  | 0  |
| 241 | 26  | 25 |
| 246 | 79  | 15 |
| 247 | 26  | 20 |
| 248 | 105 | 25 |
| 249 | 132 | 40 |
| 250 | 132 | 20 |
| 251 | 53  | 15 |

|     |     |    |
|-----|-----|----|
| 252 | 26  | 10 |
| 253 | 79  | 0  |
| 254 | 53  | 20 |
| 255 | 53  | 25 |
| 257 | 158 | 70 |
| 258 | 158 | 40 |
| 259 | 53  | 20 |
| 260 | 105 | 20 |
| 261 | 26  | 15 |
| 262 | 132 | 20 |
| 267 | 53  | 30 |
| 268 | 132 | 30 |
| 269 | 53  | 30 |
| 270 | 79  | 35 |
| 271 | 79  | 20 |
| 272 | 105 | 25 |
| 273 | 184 | 25 |
| 276 | 53  | 10 |
| 277 | 26  | 10 |
| 278 | 184 | 30 |
| 279 | 105 | 15 |
| 280 | 79  | 25 |
| 281 | 184 | 25 |
| 282 | 105 | 20 |
| 283 | 184 | 20 |
| 284 | 158 | 20 |
| 289 | 105 | 30 |
| 290 | 105 | 50 |



|     |     |    |
|-----|-----|----|
| 291 | 53  | 10 |
| 292 | 26  | 0  |
| 293 | 132 | 15 |
| 294 | 79  | 20 |
| 295 | 105 | 35 |
| 296 | 132 | 10 |
| 297 | 79  | 15 |
| 298 | 184 | 30 |
| 299 | 53  | 10 |
| 300 | 53  | 10 |
| 301 | 53  | 20 |
| 302 | 105 | 30 |
| 303 | 237 | 35 |
| 304 | 132 | 35 |
| 305 | 316 | 25 |
| 309 | 53  | 0  |
| 310 | 26  | 0  |
| 311 | 184 | 35 |
| 312 | 158 | 20 |
| 313 | 105 | 15 |
| 314 | 26  | 0  |
| 315 | 53  | 30 |
| 316 | 105 | 10 |
| 317 | 79  | 30 |
| 318 | 105 | 40 |
| 319 | 79  | 10 |
| 320 | 105 | 25 |
| 321 | 132 | 45 |

|     |     |    |
|-----|-----|----|
| 322 | 132 | 40 |
| 323 | 53  | 20 |
| 326 | 184 | 45 |
| 328 | 26  | 30 |
| 329 | 132 | 15 |
| 330 | 158 | 70 |
| 332 | 53  | 20 |
| 333 | 237 | 30 |
| 334 | 184 | 20 |
| 335 | 184 | 25 |
| 336 | 79  | 10 |
| 337 | 132 | 15 |
| 338 | 26  | 0  |
| 339 | 53  | 30 |
| 340 | 79  | 30 |
| 341 | 26  | 15 |
| 346 | 132 | 30 |
| 347 | 132 | 30 |
| 348 | 237 | 20 |
| 349 | 158 | 20 |
| 350 | 158 | 25 |
| 351 | 105 | 40 |
| 352 | 53  | 25 |
| 354 | 26  | 0  |
| 355 | 79  | 30 |
| 359 | 26  | 25 |
| 360 | 158 | 25 |
| 361 | 79  | 35 |

|     |     |    |
|-----|-----|----|
| 362 | 26  | 20 |
| 363 | 79  | 30 |
| 364 | 26  | 0  |
| 366 | 53  | 15 |
| 368 | 26  | 0  |
| 370 | 158 | 40 |
| 371 | 211 | 40 |
| 372 | 26  | 0  |
| 373 | 105 | 10 |
| 374 | 105 | 35 |
| 380 | 184 | 20 |

---

b)

| ID  | Treethrow<br>density | Treethrow<br>depth |
|-----|----------------------|--------------------|
| 4   | 26                   | 5                  |
| 5   | 53                   | 40                 |
| 7   | 26                   | 0                  |
| 41  | 26                   | 5                  |
| 45  | 26                   | 15                 |
| 46  | 26                   | 15                 |
| 74  | 26                   | 20                 |
| 80  | 26                   | 5                  |
| 100 | 26                   | 0                  |
| 101 | 26                   | 30                 |
| 121 | 26                   | 0                  |
| 136 | 26                   | 0                  |
| 146 | 26                   | 5                  |
| 152 | 26                   | 10                 |
| 161 | 26                   | 10                 |
| 166 | 26                   | 15                 |
| 178 | 26                   | 5                  |
| 183 | 26                   | 10                 |
| 195 | 26                   | 0                  |
| 196 | 26                   | 0                  |
| 209 | 26                   | 15                 |
| 210 | 26                   | 0                  |
| 232 | 26                   | 0                  |
| 249 | 26                   | 30                 |
| 262 | 53                   | 0                  |

|     |    |    |
|-----|----|----|
| 271 | 26 | 10 |
| 281 | 26 | 20 |
| 282 | 26 | 25 |
| 284 | 26 | 25 |
| 294 | 26 | 40 |
| 340 | 53 | 40 |
| 354 | 26 | 25 |
| 371 | 26 | 40 |

c)

| ID | Treethrow<br>density | Treethrow<br>depth |
|----|----------------------|--------------------|
| 4  | 200                  | 50                 |
| 7  | 57                   | 90                 |
| 15 | 29                   | 50                 |
| 16 | 29                   | 70                 |
| 20 | 29                   | 20                 |
| 21 | 57                   | 20                 |
| 22 | 86                   | 100                |

|     |     |     |
|-----|-----|-----|
| 25  | 29  | 10  |
| 32  | 29  | 85  |
| 43  | 29  | 10  |
| 47  | 29  | 80  |
| 69  | 57  | 20  |
| 70  | 29  | 0   |
| 73  | 86  | 120 |
| 87  | 57  | 45  |
| 89  | 29  | 110 |
| 90  | 57  | 70  |
| 103 | 57  | 10  |
| 114 | 57  | 80  |
| 118 | 29  | 70  |
| 129 | 86  | 70  |
| 132 | 29  | 0   |
| 133 | 29  | 50  |
| 139 | 57  | 35  |
| 144 | 29  | 15  |
| 146 | 86  | 40  |
| 147 | 57  | 65  |
| 149 | 29  | 65  |
| 151 | 57  | 45  |
| 152 | 200 | 20  |
| 156 | 29  | 110 |
| 157 | 86  | 80  |
| 159 | 57  | 40  |
| 172 | 29  | 90  |
| 184 | 57  | 30  |

|     |     |     |
|-----|-----|-----|
| 187 | 29  | 55  |
| 190 | 29  | 0   |
| 192 | 86  | 70  |
| 194 | 86  | 60  |
| 195 | 57  | 70  |
| 196 | 29  | 0   |
| 197 | 57  | 130 |
| 202 | 57  | 30  |
| 209 | 29  | 25  |
| 210 | 57  | 30  |
| 224 | 29  | 47  |
| 233 | 57  | 55  |
| 235 | 29  | 25  |
| 241 | 171 | 90  |
| 249 | 29  | 75  |
| 251 | 57  | 100 |
| 252 | 29  | 60  |
| 253 | 143 | 100 |
| 254 | 57  | 55  |
| 258 | 29  | 50  |
| 259 | 86  | 15  |
| 261 | 29  | 90  |
| 276 | 29  | 10  |
| 277 | 143 | 220 |
| 278 | 57  | 40  |
| 281 | 57  | 15  |
| 296 | 29  | 10  |
| 297 | 57  | 15  |

|     |     |     |
|-----|-----|-----|
| 300 | 29  | 20  |
| 302 | 86  | 60  |
| 304 | 57  | 20  |
| 305 | 29  | 0   |
| 314 | 29  | 45  |
| 317 | 57  | 75  |
| 318 | 57  | 120 |
| 320 | 29  | 90  |
| 321 | 29  | 40  |
| 323 | 86  | 70  |
| 328 | 29  | 0   |
| 330 | 29  | 50  |
| 334 | 57  | 110 |
| 335 | 57  | 85  |
| 336 | 86  | 75  |
| 337 | 114 | 90  |
| 338 | 114 | 40  |
| 339 | 86  | 75  |
| 341 | 57  | 55  |
| 349 | 29  | 10  |
| 351 | 229 | 90  |
| 352 | 257 | 70  |
| 353 | 86  | 40  |
| 354 | 86  | 60  |
| 355 | 29  | 40  |
| 359 | 29  | 50  |
| 360 | 29  | 0   |
| 361 | 57  | 15  |



|     |     |     |
|-----|-----|-----|
| 363 | 29  | 90  |
| 364 | 429 | 60  |
| 366 | 57  | 15  |
| 368 | 86  | 70  |
| 370 | 86  | 190 |
| 371 | 200 | 70  |
| 372 | 86  | 35  |
| 373 | 143 | 80  |
| 374 | 114 | 55  |
| 379 | 143 | 50  |
| 381 | 114 | 20  |

---

**Table S2.** a) Descriptive statistics of the surface and subsurface layers. b) The descriptive statistics are also shown for Podzols and Cambisols in the surface and subsurface layers. (N=309 samples for the surface and 309 samples for the subsurface layer).

a)

| Soil chemical properties                         | Surface layer |          |         |         |        |       |          | Subsurface layer |          |         |         |         |       |          |
|--------------------------------------------------|---------------|----------|---------|---------|--------|-------|----------|------------------|----------|---------|---------|---------|-------|----------|
|                                                  | mean          | Std. Dev | maximum | minimum | median | CV(%) | Skewness | mean             | Std. Dev | maximum | minimum | median  | CV(%) | Skewness |
| <b>External</b>                                  |               |          |         |         |        |       |          |                  |          |         |         |         |       |          |
| <b>Cox (%)</b>                                   | 9.4           | 2.2      | 19.8    | 4.6     | 9.3    | 23.6  | 0.4      | 2.8              | 0.7      | 5.6     | 1.4     | 2.8     | 25.2  | -0.1     |
| <b>pH<sub>KCl</sub></b>                          | 3.1           | 0.2      | 3.8     | 2.5     | 3.1    | 5.8   | 0.4      | 4.0              | 0.1      | 4.3     | 3.5     | 4.0     | 2.9   | 0.5      |
| <b>CEC (mmol+kg<sup>-1</sup>)</b>                | 133.7         | 18.1     | 203.0   | 78.1    | 133.4  | 13.5  | 0.2      | 58.3             | 19.2     | 137.3   | 11.6    | 57.8    | 32.8  | 0.0      |
| <b>EA (mmol+kg<sup>-1</sup>)</b>                 | 130.2         | 23.3     | 209.0   | 62.0    | 131.0  | 17.9  | -0.1     | 54.9             | 14.3     | 133.0   | 27.0    | 53.0    | 26.0  | 0.4      |
| <b>Mg <sup>+2</sup> (mg kg<sup>-1</sup>)</b>     | 63.7          | 20.0     | 213.0   | 16.0    | 62.0   | 31.4  | -0.4     | 9.7              | 12.0     | 126.5   | 1.9     | 6.2     | 124.2 | 0.5      |
| <b>Ca <sup>+2</sup> (mg kg<sup>-1</sup>)</b>     | 0.3           | 0.2      | 2.0     | 0.0     | 0.3    | 66.6  | 0.7      | 0.1              | 0.1      | 0.9     | 0.0     | 0.1     | 113.7 | -3.3     |
| <b>Na <sup>+</sup> (mg kg<sup>-1</sup>)</b>      | 13.6          | 8.7      | 85.0    | 0.0     | 12.0   | 63.8  | 3.3      | 13.1             | 8.8      | 57.1    | 4.1     | 9.7     | 67.2  | 0.9      |
| <b>K <sup>+</sup> (mg kg<sup>-1</sup>)</b>       | 112.6         | 29.1     | 253.0   | 42.0    | 112.0  | 25.9  | 0.5      | 21.8             | 12.0     | 95.7    | 8.1     | 18.2    | 55.1  | 0.5      |
| <b>Al (X) <sup>+1</sup> (mg kg<sup>-1</sup>)</b> | 118.6         | 25.6     | 188.2   | 50.1    | 117.2  | 21.6  | 0.1      | 14.6             | 3.7      | 29.0    | 8.1     | 13.8    | 25.3  | 0.5      |
| <b>Al (Y) <sup>+2</sup> (mg kg<sup>-1</sup>)</b> | 11.4          | 3.2      | 27.8    | 5.3     | 11.0   | 28.2  | 0.3      | 7.7              | 4.3      | 25.6    | 3.0     | 6.3     | 56.0  | 0.1      |
| <b>Al <sup>+3</sup> (mg kg<sup>-1</sup>)</b>     | 556.3         | 140.5    | 875.4   | 64.1    | 554.0  | 25.3  | -0.4     | 345.8            | 82.6     | 657.1   | 96.5    | 334.4   | 23.9  | 0.1      |
| <b>Pedogenic</b>                                 |               |          |         |         |        |       |          |                  |          |         |         |         |       |          |
| <b>Al<sub>KClsum</sub></b>                       | 686.3         | 158.3    | 1069.8  | 127.1   | 689.5  | 23.1  | -0.3     | 368.1            | 85.6     | 692.7   | 116.8   | 356.9   | 23.3  | -0.3     |
| <b>Al<sub>KCl</sub> (mg kg<sup>-1</sup>)</b>     | 688.9         | 171.6    | 1127.2  | 121.7   | 685.7  | 24.9  | -0.1     | 395.6            | 84.5     | 687.5   | 135.9   | 384.4   | 21.4  | 0.5      |
| <b>Mn<sub>KCl</sub> (mg kg<sup>-1</sup>)</b>     | 60.6          | 77.7     | 424.4   | 0.8     | 25.6   | 128.3 | -0.1     | 6.8              | 6.4      | 42.6    | 0.2     | 5.7     | 93.1  | 0.4      |
| <b>Fe<sub>KCl</sub> (mg kg<sup>-1</sup>)</b>     | 228.0         | 120.3    | 625.7   | 12.5    | 221.9  | 52.7  | 0.5      | 9.0              | 7.5      | 53.2    | 1.6     | 6.9     | 83.2  | 0.3      |
| <b>Al<sub>ox</sub> (mg kg<sup>-1</sup>)</b>      | 4170.7        | 1006.5   | 7493.2  | 970.8   | 3994.8 | 24.1  | 0.5      | 12201.9          | 4773.1   | 29484.4 | 2080.4  | 11560.2 | 39.1  | -0.1     |

|                                              |         |        |         |        |         |       |      |         |        |         |        |         |      |      |
|----------------------------------------------|---------|--------|---------|--------|---------|-------|------|---------|--------|---------|--------|---------|------|------|
| <b>Mn<sub>ox</sub> (mg kg<sup>-1</sup>)</b>  | 140.6   | 161.5  | 1092.8  | 0.7    | 78.5    | 114.9 | -0.4 | 198.4   | 182.9  | 1010.3  | 3.3    | 144.2   | 92.2 | 0.4  |
| <b>Fe<sub>ox</sub> (mg kg<sup>-1</sup>)</b>  | 12202.9 | 3559.7 | 30868.2 | 1463.3 | 11793.4 | 29.2  | 0.0  | 12296.0 | 3579.9 | 30117.4 | 3235.9 | 12076.0 | 29.1 | 0.3  |
| <b>Si<sub>ox</sub> (mg kg<sup>-1</sup>)</b>  | 246.8   | 125.5  | 640.0   | 0.0    | 232.0   | 50.9  | 0.5  | 1299.7  | 861.2  | 5604.0  | 128.0  | 1126.0  | 66.3 | 0.5  |
| <b>Al<sub>dit</sub> (mg kg<sup>-1</sup>)</b> | 3473.9  | 1083.3 | 6848.8  | 383.8  | 3458.8  | 31.2  | 0.2  | 8936.1  | 3502.7 | 18987.5 | 857.5  | 8520.0  | 39.2 | -0.2 |
| <b>Mn<sub>dit</sub> (mg kg<sup>-1</sup>)</b> | 175.6   | 177.5  | 1039.9  | 0.0    | 116.4   | 101.1 | 1.6  | 279.5   | 193.2  | 1115.0  | 12.0   | 239.5   | 69.1 | 0.2  |
| <b>Fe<sub>dit</sub> (mg kg<sup>-1</sup>)</b> | 18039.2 | 4269.8 | 37043.5 | 3091.5 | 17735.0 | 23.7  | 0.3  | 21086.7 | 4563.1 | 38698.8 | 2890.8 | 20967.5 | 21.6 | 0.3  |
| <b>Si<sub>dit</sub> (mg kg<sup>-1</sup>)</b> | 721.8   | 497.9  | 2725.0  | 0.0    | 675.0   | 69.0  | 0.5  | 1198.5  | 603.5  | 3900.0  | 0.0    | 1150.0  | 50.4 | -0.4 |

b)

| Soil chemical properties                         | Podzol        |          |                  |          | Cambisol      |          |                  |          |
|--------------------------------------------------|---------------|----------|------------------|----------|---------------|----------|------------------|----------|
|                                                  | Surface layer |          | Subsurface layer |          | Surface layer |          | Subsurface layer |          |
|                                                  | mean          | Std. Dev | mean             | Std. Dev | mean          | Std. Dev | mean             | Std. Dev |
| <b>External</b>                                  |               |          |                  |          |               |          |                  |          |
| <b>Cox (%)</b>                                   | 10.4          | 1.1      | 3.2              | 0.3      | 9.0           | 0.7      | 2.6              | 0.1      |
| <b>pH<sub>KCl</sub></b>                          | 3.1           | 0.1      | 4.0              | 0.0      | 2.9           | 0.1      | 4.0              | 0.0      |
| <b>CEC (mmol+kg<sup>-1</sup>)</b>                | 128.0         | 6.1      | 67.4             | 8.5      | 134.3         | 1.7      | 54.8             | 0.8      |
| <b>EA (mmol+kg<sup>-1</sup>)</b>                 | 124.1         | 8.5      | 62.1             | 5.6      | 127.9         | 0.3      | 52.8             | 1.8      |
| <b>Mg <sup>+2</sup> (mg kg<sup>-1</sup>)</b>     | 53.4          | 6.6      | 6.1              | 3.0      | 68.0          | 3.7      | 11.5             | 2.1      |
| <b>Ca <sup>+2</sup> (mg kg<sup>-1</sup>)</b>     | 0.3           | 0.0      | 0.1              | 0.0      | 0.4           | 0.0      | 0.1              | 0.0      |
| <b>Na <sup>+</sup> (mg kg<sup>-1</sup>)</b>      | 16.5          | 4.1      | 11.6             | 0.6      | 12.6          | 2.2      | 14.9             | 2.2      |
| <b>K <sup>+</sup> (mg kg<sup>-1</sup>)</b>       | 106.8         | 5.1      | 16.8             | 2.1      | 117.8         | 2.5      | 24.9             | 1.1      |
| <b>Al (X) <sup>+1</sup> (mg kg<sup>-1</sup>)</b> | 107.7         | 12.8     | 17.1             | 1.4      | 112.3         | 3.4      | 13.1             | 0.4      |
| <b>Al (Y) <sup>+2</sup> (mg kg<sup>-1</sup>)</b> | 10.7          | 1.2      | 6.5              | 1.2      | 11.1          | 0.3      | 8.0              | 0.4      |

|                                              |         |        |         |        |         |       |         |       |
|----------------------------------------------|---------|--------|---------|--------|---------|-------|---------|-------|
| <b>Al<sup>+3</sup> (mg kg<sup>-1</sup>)</b>  | 508.3   | 69.4   | 380.9   | 22.2   | 541.1   | 4.2   | 334.2   | 0.9   |
| <b>Pedogenic</b>                             |         |        |         |        |         |       |         |       |
| <b>Al<sub>KClsum</sub></b>                   | 626.7   | 82.9   | 404.5   | 23.4   | 664.5   | 0.5   | 355.3   | 0.1   |
| <b>Al<sub>KCl</sub> (mg kg<sup>-1</sup>)</b> | 630.4   | 83.5   | 433.5   | 24.7   | 661.0   | 7.6   | 381.5   | 1.0   |
| <b>Mn<sub>KCl</sub> (mg kg<sup>-1</sup>)</b> | 17.9    | 20.0   | 2.5     | 2.8    | 86.8    | 2.7   | 9.9     | 1.4   |
| <b>Fe<sub>KCl</sub> (mg kg<sup>-1</sup>)</b> | 235.2   | 33.4   | 14.1    | 3.4    | 186.7   | 23.6  | 6.0     | 0.3   |
| <b>Al<sub>ox</sub> (mg kg<sup>-1</sup>)</b>  | 3469.8  | 769.2  | 17057.0 | 3415.6 | 4318.2  | 373.0 | 10384.0 | 537.1 |
| <b>Mn<sub>ox</sub> (mg kg<sup>-1</sup>)</b>  | 42.4    | 45.8   | 77.4    | 75.8   | 215.8   | 11.6  | 294.1   | 3.3   |
| <b>Fe<sub>ox</sub> (mg kg<sup>-1</sup>)</b>  | 9815.4  | 2469.5 | 11730.2 | 773.5  | 12083.4 | 401.2 | 11804.0 | 30.5  |
| <b>Si<sub>ox</sub> (mg kg<sup>-1</sup>)</b>  | 150.9   | 99.5   | 2288.3  | 744.5  | 299.8   | 38.3  | 987.1   | 69.3  |
| <b>Al<sub>dit</sub> (mg kg<sup>-1</sup>)</b> | 2927.1  | 585.8  | 11803.4 | 2370.4 | 3526.1  | 32.6  | 7881.8  | 492.4 |
| <b>Mn<sub>dit</sub> (mg kg<sup>-1</sup>)</b> | 57.4    | 49.4   | 177.4   | 75.4   | 257.5   | 10.0  | 371.8   | 2.7   |
| <b>Fe<sub>dit</sub> (mg kg<sup>-1</sup>)</b> | 14478.9 | 3345.5 | 21502.6 | 988.1  | 18060.1 | 901.4 | 20523.5 | 45.2  |
| <b>Si<sub>dit</sub> (mg kg<sup>-1</sup>)</b> | 696.2   | 100.8  | 1523.2  | 299.7  | 740.4   | 38.0  | 1148.8  | 37.6  |

**Table S3.** Pearson correlation coefficient for the relationship between treethrow density and depth of treethrow and soil chemical properties for totally and partly decomposed treethrow and fresh treethrow. Significant relations are indicated in bold and marked according to their significance level: \*\*\*p < 0.001; \*\*p < 0.05; \*p < 0.1. Noted that the relations showed in the table are the significant in Treethrow density and Depth of treethrow. The soil unit analysed are: AlPo-Albic Podzol, EnPo-Entic Podzol, DyCa-Dystric Cambisol, HaCa-Haplic Cambisol.

a) Totally decomposed treethrow

| Treethrow density    |                  |  |                 |                  |                 |       |      |               |                 |       |                |                  |  |  |  |
|----------------------|------------------|--|-----------------|------------------|-----------------|-------|------|---------------|-----------------|-------|----------------|------------------|--|--|--|
| Surface layer        |                  |  |                 | Subsurface layer |                 |       |      | Surface layer |                 |       |                | Subsurface layer |  |  |  |
|                      |                  |  |                 | Soil Unit        |                 |       |      |               |                 |       |                |                  |  |  |  |
|                      |                  |  |                 | AlPo             | EnPo            | DyCa  | HaCa | AlPo          | EnPo            | DyCa  | HaCa           |                  |  |  |  |
| External             |                  |  |                 |                  |                 |       |      |               |                 |       |                |                  |  |  |  |
| Cox                  | 0.03             |  | <b>0.15</b> **  | 0.02             | 0.06            | 0     | -0.1 | 0.15          | <b>0.17</b> **  | -0.09 | -0.13          |                  |  |  |  |
| pH                   | <b>-0.22</b> *** |  | 0.09            | 0.43             | <b>-0.16</b> ** | -0.17 | 0.06 | 0.2           | 0.05            | -0.25 | -0.14          |                  |  |  |  |
| CEC                  | 0.08             |  | 0.05            | 0.09             | 0.05            | -0.07 | 0    | 0.08          | 0.11            | 0.16  | 0.1            |                  |  |  |  |
| EA                   | 0.03             |  | 0.10 *          | 0.24             | 0.01            | 0     | 0    | 0.13          | 0.00            | 0.10  | 0.18           |                  |  |  |  |
| Mg <sup>+2</sup>     | 0.06             |  | <b>-0.14</b> ** | 0.001            | -0.03           | 0.03  | 0.02 | 0.27          | -0.12           | -0.27 | 0.01           |                  |  |  |  |
| Ca <sup>+2</sup>     | 0.00             |  | <b>-0.10</b> *  | 0.07             | -0.01           | -0.14 | 0.01 | 0.27          | 0.08            | -0.07 | -0.09          |                  |  |  |  |
| Na <sup>+</sup>      | 0.00             |  | -0.03           | 0.46             | 0.05            | -0.05 | -0.2 | <b>0.57</b> * | 0.18            | -0.10 | <b>-0.22</b> * |                  |  |  |  |
| K <sup>+</sup>       | 0.03             |  | <b>-0.14</b> ** | 0.1              | <b>0.17</b> **  | 0.06  | 0.05 | 0.16          | 0.06            | -0.28 | 0              |                  |  |  |  |
| Al (X) <sup>+1</sup> | 0.01             |  | <b>-0.11</b> *  | 0.38             | 0.08            | 0.06  | 0.02 | 0.13          | 0.00            | 0.21  | 0.08           |                  |  |  |  |
| Al (Y) <sup>+2</sup> | 0.01             |  | <b>-0.09</b> *  | 0.14             | -0.03           | 0.13  | 0.18 | 0.3           | <b>-0.17</b> ** | 0.09  | 0.17           |                  |  |  |  |
| Al <sup>+3</sup>     | 0.01             |  | 0.03            | 0.22             | -0.11           | 0.03  | 0    | 0.06          | -0.06           | 0.11  | 0.03           |                  |  |  |  |
| Pedogenic            |                  |  |                 |                  |                 |       |      |               |                 |       |                |                  |  |  |  |
| Al <sub>Kclsum</sub> | 0.08             |  | 0.03            | 0.27             | -0.08           | 0.1   | 0.04 | 0.06          | 0.08            | 0.12  | 0.05           |                  |  |  |  |
| Al <sub>KCl</sub>    | 0.60             |  | 0.06            | 0.25             | -0.06           | 0.08  | 0.01 | 0.09          | -0.03           | 0.14  | 0.08           |                  |  |  |  |

|                         |              |     |              |     |      |              |     |       |      |             |              |             |       |              |       |
|-------------------------|--------------|-----|--------------|-----|------|--------------|-----|-------|------|-------------|--------------|-------------|-------|--------------|-------|
| <i>Mn<sub>KCl</sub></i> | <b>-0.17</b> | **  | <b>-0.24</b> | *** | 0.06 | <b>-0.15</b> | *   | -0.06 | -0   | 0.3         | <b>-0.14</b> | *           | 0.03  | <b>-0.22</b> | *     |
| <i>Fe<sub>KCl</sub></i> | 0.06         |     | -0.03        |     | 0.43 | -0.05        |     | 0     | 0.02 | 0.02        | -0.10        |             | 0.09  | 0.1          |       |
| <i>Al<sub>ox</sub></i>  | <b>-0.18</b> | *** | <b>0.32</b>  | *** | 0.16 | <b>-0.14</b> | *   | -0.06 | -0   | <b>0.63</b> | *            | <b>0.33</b> | ***   | -0.20        | -0.04 |
| <i>Mn<sub>ox</sub></i>  | <b>-0.18</b> | *** | <b>-0.23</b> | *** | 0.19 | <b>-0.22</b> | *** | 0.08  | -0.1 | 0.27        | <b>-0.17</b> | **          | -0.10 | -0.15        |       |
| <i>Fe<sub>ox</sub></i>  | <b>-0.18</b> | *** | -0.08        |     | 0.11 | <b>-0.2</b>  | **  | -0.06 | 0.08 | 0.16        | <b>-0.08</b> |             | -0.02 | -0.1         |       |
| <i>Si<sub>ox</sub></i>  | <b>-0.21</b> | *** | <b>0.27</b>  | *** | 0.4  | <b>-0.2</b>  | *** | 0     | -0   | 0.48        | <b>0.28</b>  | ***         | -0.18 | -0.04        |       |
| <i>Al<sub>dit</sub></i> | <b>-0.14</b> | *   | <b>0.25</b>  | *** | 0.17 | -0.09        |     | -0.16 | 0.09 | 0.24        | <b>0.26</b>  | ***         | -0.09 | -0.06        |       |
| <i>Mn<sub>dit</sub></i> | <b>-0.14</b> | *** | <b>-0.20</b> | *** | 0.06 | <b>-0.21</b> | *** | 0.03  | -0.1 | 0.29        | <b>-0.19</b> | **          | 0.04  | -0.03        |       |
| <i>Fe<sub>dit</sub></i> | <b>-0.14</b> | **  | <b>0.15</b>  | **  | 0.23 | -0.12        |     | -0.01 | -0.1 | 0.28        | <b>0.18</b>  | **          | 0.06  | -0.04        |       |
| <i>Si<sub>dit</sub></i> | 0.03         |     | 0.05         |     | 0.03 | -0.09        |     | 0.2   | -0.1 | 0.39        | 0.06         |             | -0.19 | 0.01         |       |

| Treethrow depth  |       |     |                  |   |               |       |       |       |                  |       |       |      |       |
|------------------|-------|-----|------------------|---|---------------|-------|-------|-------|------------------|-------|-------|------|-------|
| Surface layer    |       |     | Subsurface layer |   | Surface layer |       |       |       | Subsurface layer |       |       |      |       |
|                  |       |     |                  |   | Soil Unit     |       |       |       |                  |       |       |      |       |
|                  |       |     |                  |   | AlPo          | EnPo  | DyCa  | HaCa  | AlPo             | EnPo  | DyCa  | HaCa |       |
| External         |       |     |                  |   |               |       |       |       |                  |       |       |      |       |
| Cox              | 0.19  | *** | 0.00             |   | 0.285         | 0.08  | 0.01  | 0.11  | -0.6             | -0.08 | -0.43 | **   | -0.07 |
| pH               | -0.06 |     | 0.04             |   | 0.17          | 0.05  | -0.05 | -0    | -0.2             | -0.09 | -0.35 | *    | -0.05 |
| CEC              | 0.05  |     | 0.03             |   | -0.34         | -0.01 | -0.1  | 0.01  | -0.3             | -0.04 | -0.07 |      | -0.03 |
| EA               | 0.07  |     | 0.05             |   | -0.02         | 0.01  | 0.01  | -0.01 | -0.2             | -0.01 | 0.192 |      | -0.02 |
| Mg <sup>+2</sup> | 0.09  |     | -0.11            | * | 0.14          | 0.06  | 0.06  | 0.06  | 0.27             | 0.02  | -0.34 | *    | -0.13 |
| Ca <sup>+2</sup> | 0.04  |     | -0.03            |   | -0.12         | 0.08  | -0.15 | 0.04  | 0.18             | -0.08 | -0.1  |      | -0.11 |
| Na <sup>+</sup>  | 0.05  |     | 0.00             |   | 0.076         | 0.05  | -0.13 | 0.06  | -0.1             | -0.07 | 0.182 |      | -0.16 |
| K <sup>+</sup>   | 0.12  | **  | -0.08            |   | 0.191         | 0.09  | -0.07 | 0.09  | 0.39             | -0.06 | -0.1  |      | -0.09 |

|                             |                |                 |       |       |       |       |      |               |                |                |
|-----------------------------|----------------|-----------------|-------|-------|-------|-------|------|---------------|----------------|----------------|
| <i>Al</i> (X) <sup>+1</sup> | 0.07           | 0.05            | 0.126 | 0.03  | 0.04  | 0.05  | -0   | -0.07         | 0.169          | 0.06           |
| <i>Al</i> (Y) <sup>+2</sup> | <b>0.13</b> ** | -0.02           | 0.18  | 0.04  | 0.29  | 0.06  | 0.3  | -0.09         | <b>0.319</b> * | -0.03          |
| <i>Al</i> <sup>+3</sup>     | 0.01           | 0.04            | -0.1  | -0.06 | 0.14  | -0.06 | -0.1 | -0.07         | 0.127          | 0.13           |
| <b>Pedogenic</b>            |                |                 |       |       |       |       |      |               |                |                |
| <i>Al</i> <sub>Kclsum</sub> | 0.02           | 0.04            | -0.07 | -0.04 | 0.13  | -0.03 | -0.2 | -0.06         | 0.142          | 0.12           |
| <i>Al</i> <sub>KCl</sub>    | 0.04           | 0.04            | -0.06 | 0.00  | 0.12  | 0.09  | 0.37 | 0.03          | 0.138          | 0.15           |
| <i>Mn</i> <sub>KCl</sub>    | -0.05          | -0.08           | -0.18 | -0.02 | 0.09  | 0.02  | 0.09 | -0.08         | -0             | 0.00           |
| <i>Fe</i> <sub>KCl</sub>    | 0.09           | 0.00            | 0.234 | 0.00  | -0.07 | 0.02  | 0.09 | 0.05          | 0.177          | 0.05           |
| <i>Al</i> <sub>ox</sub>     | 0.00           | <b>0.16</b> *** | 0.186 | 0.05  | 0.2   | 0.15  | -0.1 | 0.11          | -0.18          | <b>0.25</b> ** |
| <i>Mn</i> <sub>ox</sub>     | -0.06          | 0.00            | -0.16 | -0.05 | 0.04  | 0.09  | 0.32 | -0.07         | 0.005          | 0.18           |
| <i>Fe</i> <sub>ox</sub>     | 0.04           | 0.04            | 0.043 | 0.02  | 0     | 0.15  | -0.1 | 0.09          | -0.09          | 0.17           |
| <i>Si</i> <sub>ox</sub>     | -0.07          | <b>0.13</b> **  | 0.045 | -0.01 | 0.31  | 0.11  | 0.04 | 0.03          | -0.01          | <b>0.27</b> ** |
| <i>Al</i> <sub>dit</sub>    | 0.03           | 0.04            | -0.28 | -0.06 | 0.15  | 0.28  | 0.32 | 0.13          | -0.19          | 0.13           |
| <i>Mn</i> <sub>dit</sub>    | -0.06          | -0.01           | -0.25 | -0.07 | 0.09  | 0.12  | 0.12 | -0.07         | -0.09          | <b>0.27</b> ** |
| <i>Fe</i> <sub>dit</sub>    | 0.06           | 0.01            | 0.005 | 0.03  | 0.06  | 0.06  | -0   | 0.06          | -0.07          | 0.19           |
| <i>Si</i> <sub>dit</sub>    | -0.01          | 0.01            | -0.33 | -0.02 | 0.02  | -0.02 | 0.37 | <b>0.16</b> * | -0.22          | <b>0.20</b> *  |

b) Partly decomposed treethrow

|                             | Treethrow density |                  | Treethrow depth |                  |
|-----------------------------|-------------------|------------------|-----------------|------------------|
|                             | Surface layer     | Subsurface layer | Surface layer   | Subsurface layer |
| <b>External</b>             |                   |                  |                 |                  |
| <i>Cox</i>                  | 0.29              | -0.21            | 0.26            | -0.19            |
| <i>pH</i>                   | 0.00              | 0.25             | -0.08           | <b>0.36</b> **   |
| <i>CEC</i>                  | -0.12             | <b>-0.41</b> **  | -0.06           | <b>-0.32</b> *   |
| <i>EA</i>                   | -0.05             | -0.22            | -0.12           | -0.13            |
| <i>Mg</i> <sup>+2</sup>     | <b>0.37</b> **    | -0.07            | 0.16            | -0.14            |
| <i>Ca</i> <sup>+2</sup>     | 0.29              | -0.10            | 0.08            | -0.11            |
| <i>Na</i> <sup>+</sup>      | -0.15             | -0.12            | -0.06           | -0.18            |
| <i>K</i> <sup>+</sup>       | 0.21              | -0.05            | -0.03           | -0.07            |
| <i>Al (X)</i> <sup>+1</sup> | 0.10              | -0.08            | 0.18            | -0.26            |
| <i>Al (Y)</i> <sup>+2</sup> | <b>0.38</b> **    | 0.00             | <b>0.46</b> *** | -0.02            |
| <i>Al</i> <sup>+3</sup>     | -0.14             | <b>-0.33</b> *   | 0.06            | -0.13            |
| <b>Pedogenic</b>            |                   |                  |                 |                  |
| <i>Al<sub>KClsum</sub></i>  | -0.09             | <b>-0.32</b> *   | 0.10            | -0.29            |
| <i>Al<sub>KCl</sub></i>     | -0.09             | <b>-0.35</b> *   | 0.16            | 0.09             |
| <i>Mn<sub>KCl</sub></i>     | 0.08              | -0.17            | 0.12            | -0.27            |
| <i>Fe<sub>KCl</sub></i>     | -0.07             | -0.10            | 0.02            | -0.28            |
| <i>Al<sub>ox</sub></i>      | -0.02             | 0.04             | 0.05            | 0.07             |
| <i>Mn<sub>ox</sub></i>      | -0.03             | -0.15            | 0.02            | -0.01            |
| <i>Fe<sub>ox</sub></i>      | -0.19             | -0.29            | 0.08            | -0.12            |
| <i>Si<sub>ox</sub></i>      | -0.10             | 0.20             | -0.07           | 0.23             |
| <i>Al<sub>dit</sub></i>     | 0.00              | 0.03             | 0.02            | 0.17             |
| <i>Mn<sub>dit</sub></i>     | -0.04             | -0.20            | 0.02            | -0.05            |
| <i>Fe<sub>dit</sub></i>     | -0.31             | <b>-0.37</b> **  | -0.01           | 0.03             |
| <i>Si<sub>dit</sub></i>     | -0.14             | 0.26             | 0.09            | 0.28             |

c) Fresh Treethrow

|                 | Treethrow density |                  | Treethrow depth |                  |
|-----------------|-------------------|------------------|-----------------|------------------|
|                 | Surface layer     | Subsurface layer | Surface layer   | Subsurface layer |
| <b>External</b> |                   |                  |                 |                  |
| <i>Cox</i>      | 0.05              | -0.02            | <b>0.17</b> *   | 0.08             |
| <i>pH</i>       | -0.02             | 0.09             | -0.13           | -0.03            |
| <i>CEC</i>      | 0.01              | 0.13             | 0.12            | -0.03            |



|                              |              |       |              |      |                 |
|------------------------------|--------------|-------|--------------|------|-----------------|
| <i>EA</i>                    | 0.01         | 0.03  | -0.01        |      | -0.03           |
| <i>Mg</i> <sup>+2</sup>      | 0.01         | 0.04  | <b>0.20</b>  | **   | 0.12            |
| <i>Ca</i> <sup>+2</sup>      | 0.00         | 0.06  | 0.12         |      | 0.14            |
| <i>Na</i> <sup>+</sup>       | 0.00         | -0.11 | 0.06         |      | 0.10            |
| <i>K</i> <sup>+</sup>        | 0.08         | -0.14 | <b>0.32</b>  | ***  | 0.14            |
| <i>Al (X)</i> <sup>+1</sup>  | 0.05         | -0.20 | 0.12         |      | 0.05            |
| <i>Al (Y)</i> <sup>+2</sup>  | 0.01         | 0.08  | -0.03        |      | -0.09           |
| <i>Al</i> <sup>+3</sup>      | 0.05         | 0.07  | -0.06        |      | -0.11           |
| <hr/> <b>Pedogenic</b> <hr/> |              |       |              |      |                 |
| <i>Al<sub>KClSum</sub></i>   | 0.01         | 0.07  | -0.03        |      | -0.08           |
| <i>Al<sub>KCl</sub></i>      | 0.00         | 0.06  | -0.03        |      | -0.08           |
| <i>Mn<sub>KCl</sub></i>      | <b>-0.17</b> | *     | -0.24        | 0.02 | <b>0.35</b> *** |
| <i>Fe<sub>KCl</sub></i>      | -0.05        | -0.20 | 0.10         |      | 0.00            |
| <i>Al<sub>ox</sub></i>       | -0.11        | 0.03  | <b>-0.18</b> | *    | -0.01           |
| <i>Mn<sub>ox</sub></i>       | -0.13        | -0.02 | 0.02         |      | 0.09            |
| <i>Fe<sub>ox</sub></i>       | -0.13        | -0.18 | -0.18        |      | -0.14           |
| <i>Si<sub>ox</sub></i>       | 0.08         | 0.06  | -0.13        |      | 0.05            |
| <i>Al<sub>dit</sub></i>      | -0.14        | 0.03  | -0.03        |      | -0.01           |
| <i>Mn<sub>dit</sub></i>      | 0.14         | 0.06  | 0.01         |      | -0.02           |
| <i>Fe<sub>dit</sub></i>      | -0.09        | -0.07 | -0.06        |      | -0.01           |
| <i>Si<sub>dit</sub></i>      | 0.03         | 0.15  | 0.00         |      | 0.11            |

**Table S4.** Redundancy analysis (RDA). Pearson correlation coefficient for the relationship between treethrow density and treethrow depth, and soil chemical properties. No. samples indicates the number of plots in each category. Significant relations are indicated in bold and marked according to their significance level: \*\*\*p < 0.001; \*\*p < 0.05; \*p < 0.1.

a) Totally decomposed treethrow

|                          | Soil layer | No. samples | No. soil properties | Explained variability (%) | p-value    | F-value |
|--------------------------|------------|-------------|---------------------|---------------------------|------------|---------|
| <b>Treethrow density</b> | Surface    | 287         | 23                  | 2.3                       | <0.001 *** | 6.31    |
|                          | Subsurface | 287         | 23                  | 4.6                       | <0.001 *** | 11.80   |
| <b>Treethrow depth</b>   | Surface    | 287         | 23                  | 2.3                       | >0.1       | 0.26    |
|                          | Subsurface | 287         | 23                  | 4.6                       | >0.1       | 1.83    |

Entic Podzol

|                          | Soil layer | No. samples | No. soil properties | Explained variability (%) | p-value | F-value |
|--------------------------|------------|-------------|---------------------|---------------------------|---------|---------|
| <b>Treethrow density</b> | Surface    | 140         | 23                  | 4                         | <0.05** | 2.82    |
|                          | Subsurface | 140         | 23                  | 6                         | <0.05** | 6.21    |
| <b>Treethrow depth</b>   | Surface    | 140         | 23                  | 4                         | >0.1    | 0.78    |
|                          | Subsurface | 140         | 23                  | 6                         | >0.1    | 0.92    |

Haplic Cambisol

|                          | Soil layer | No. samples | No. soil properties | Explained variability (%) | p-value | F-value |
|--------------------------|------------|-------------|---------------------|---------------------------|---------|---------|
| <b>Treethrow density</b> | Surface    | 68          | 23                  | 1.6                       | >0.1    | 0.61    |
|                          | Subsurface | 68          | 23                  | 1.9                       | >0.1    | 0.21    |
| <b>Treethrow depth</b>   | Surface    | 68          | 23                  | 1.6                       | >0.1    | 0.49    |
|                          | Subsurface | 68          | 23                  | 1.9                       | >0.1    | 1.02    |

Dystric Cambisol

|                          | Soil layer | No. samples | No. soil properties | Explained variability (%) | p-value | F-value |
|--------------------------|------------|-------------|---------------------|---------------------------|---------|---------|
| <b>Treethrow density</b> | Surface    | 46          | 23                  | 3.7                       | >0.1    | 1.28    |
|                          | Subsurface | 46          | 23                  | 4.2                       | >0.1    | 0.80    |
| <b>Treethrow depth</b>   | Surface    | 46          | 23                  | 3.7                       | >0.1    | 0.37    |
|                          | Subsurface | 46          | 23                  | 4.2                       | >0.1    | 0.40    |

b) Partly decomposed treethrow

|  | Soil layer | No. samples | No. soil properties | Explained variability | p-value | F-value |
|--|------------|-------------|---------------------|-----------------------|---------|---------|
|--|------------|-------------|---------------------|-----------------------|---------|---------|

|                          | (%)        |    |    |     |         |      |
|--------------------------|------------|----|----|-----|---------|------|
| <b>Treethrow density</b> | Surface    | 33 | 23 | 3.4 | >0.1    | 0.86 |
|                          | Subsurface | 33 | 23 | 1.1 | <0.05** | 3.27 |
| <b>Treethrow depth</b>   | Surface    | 33 | 23 | 3.4 | >0.1    | 0.20 |
|                          | Subsurface | 33 | 23 | 1.1 | >0.1    | 0.44 |

c) Fresh treethrow

|                          | <b>Soil layer</b> | <b>No. samples</b> | <b>No. soil properties</b> | <b>Explained variability (%)</b> | <b>p-value</b> | <b>F-value</b> |
|--------------------------|-------------------|--------------------|----------------------------|----------------------------------|----------------|----------------|
| <b>Treethrow density</b> | Surface           | 102                | 23                         | 2.1                              | >0.1           | 1.22           |
|                          | Subsurface        | 102                | 23                         | 1.1                              | >0.1           | 0.81           |
| <b>Treethrow depth</b>   | Surface           | 102                | 23                         | 2.1                              | >0.1           | 0.92           |
|                          | Subsurface        | 102                | 23                         | 1.1                              | >0.1           | 0.36           |

Figure S1

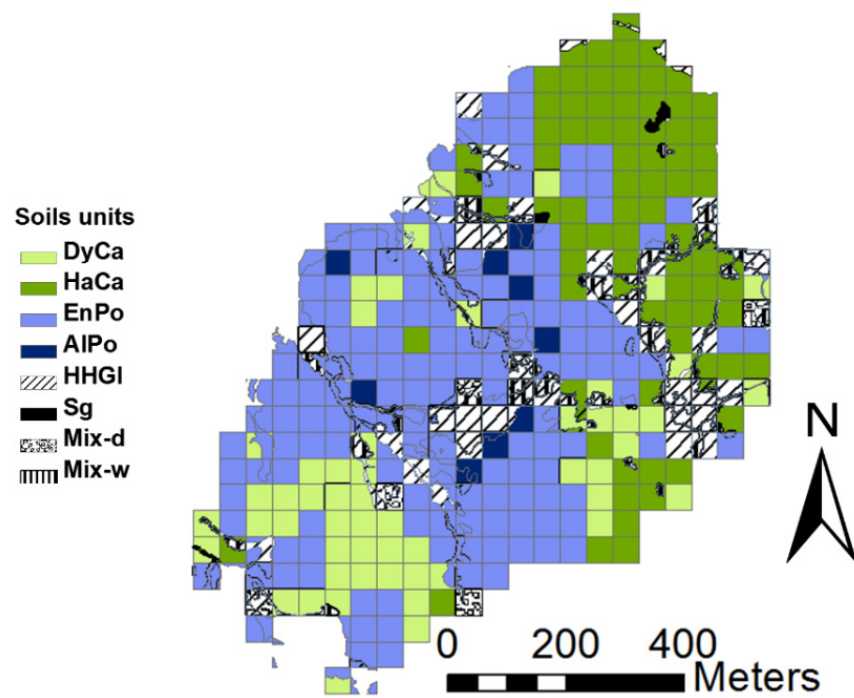

Figure S2

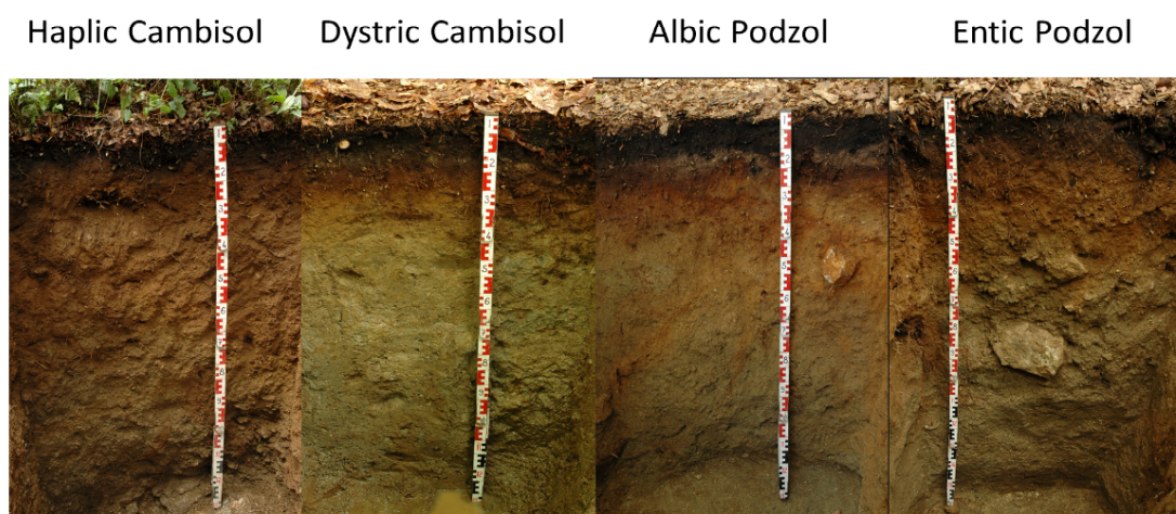

Figure S3

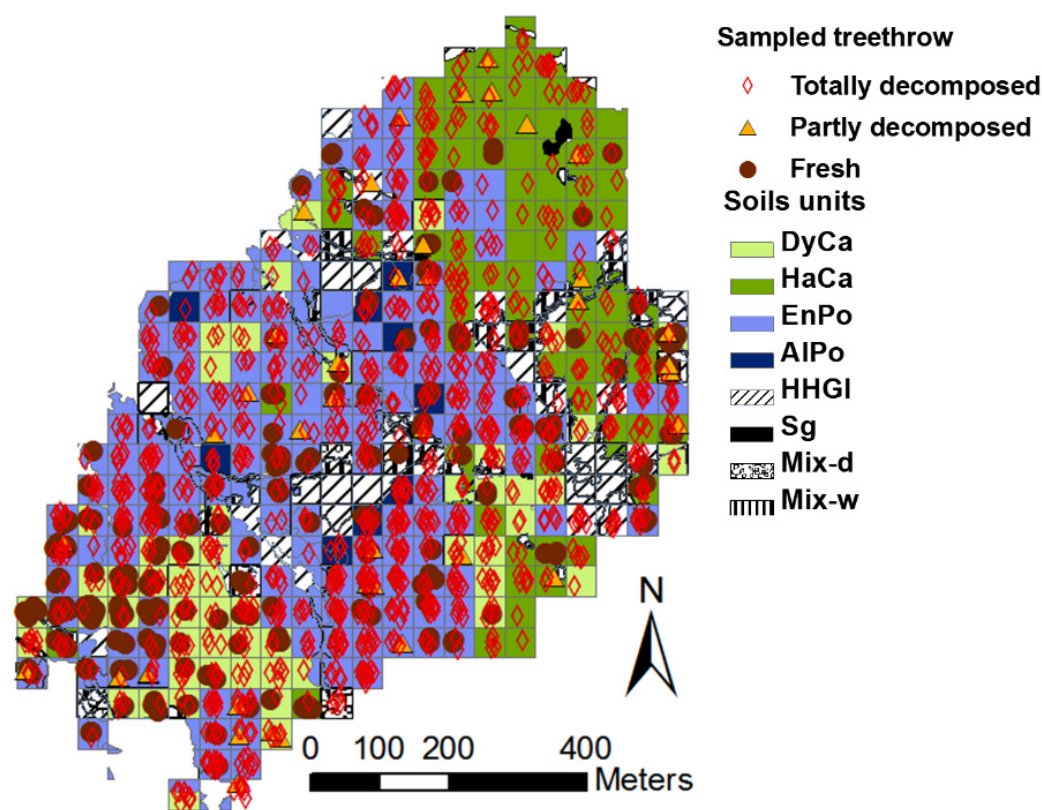

Figure S4

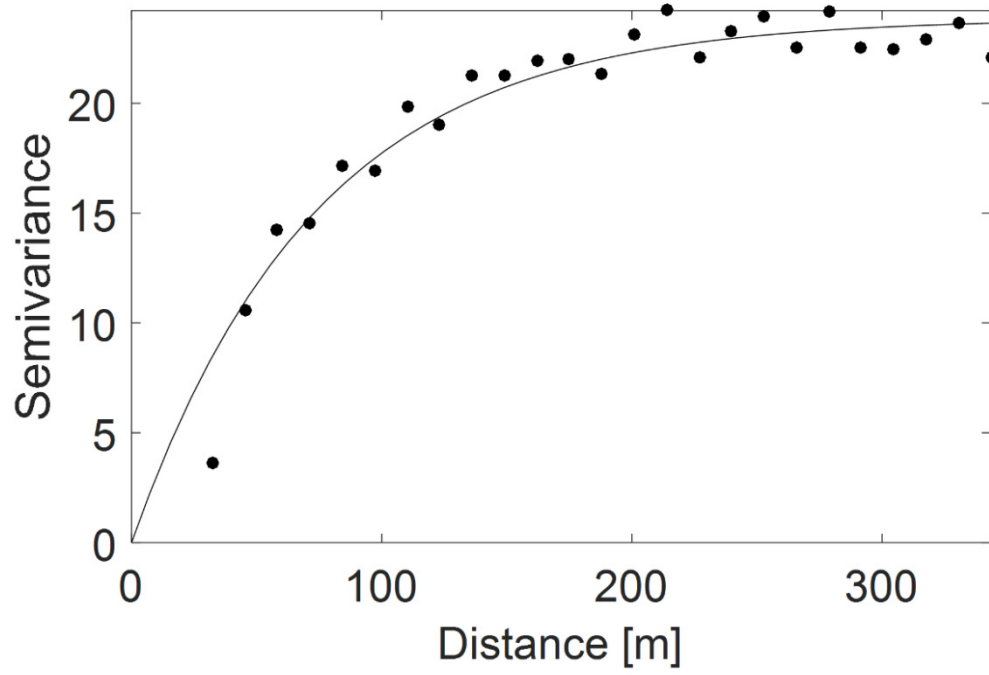

Figure S5

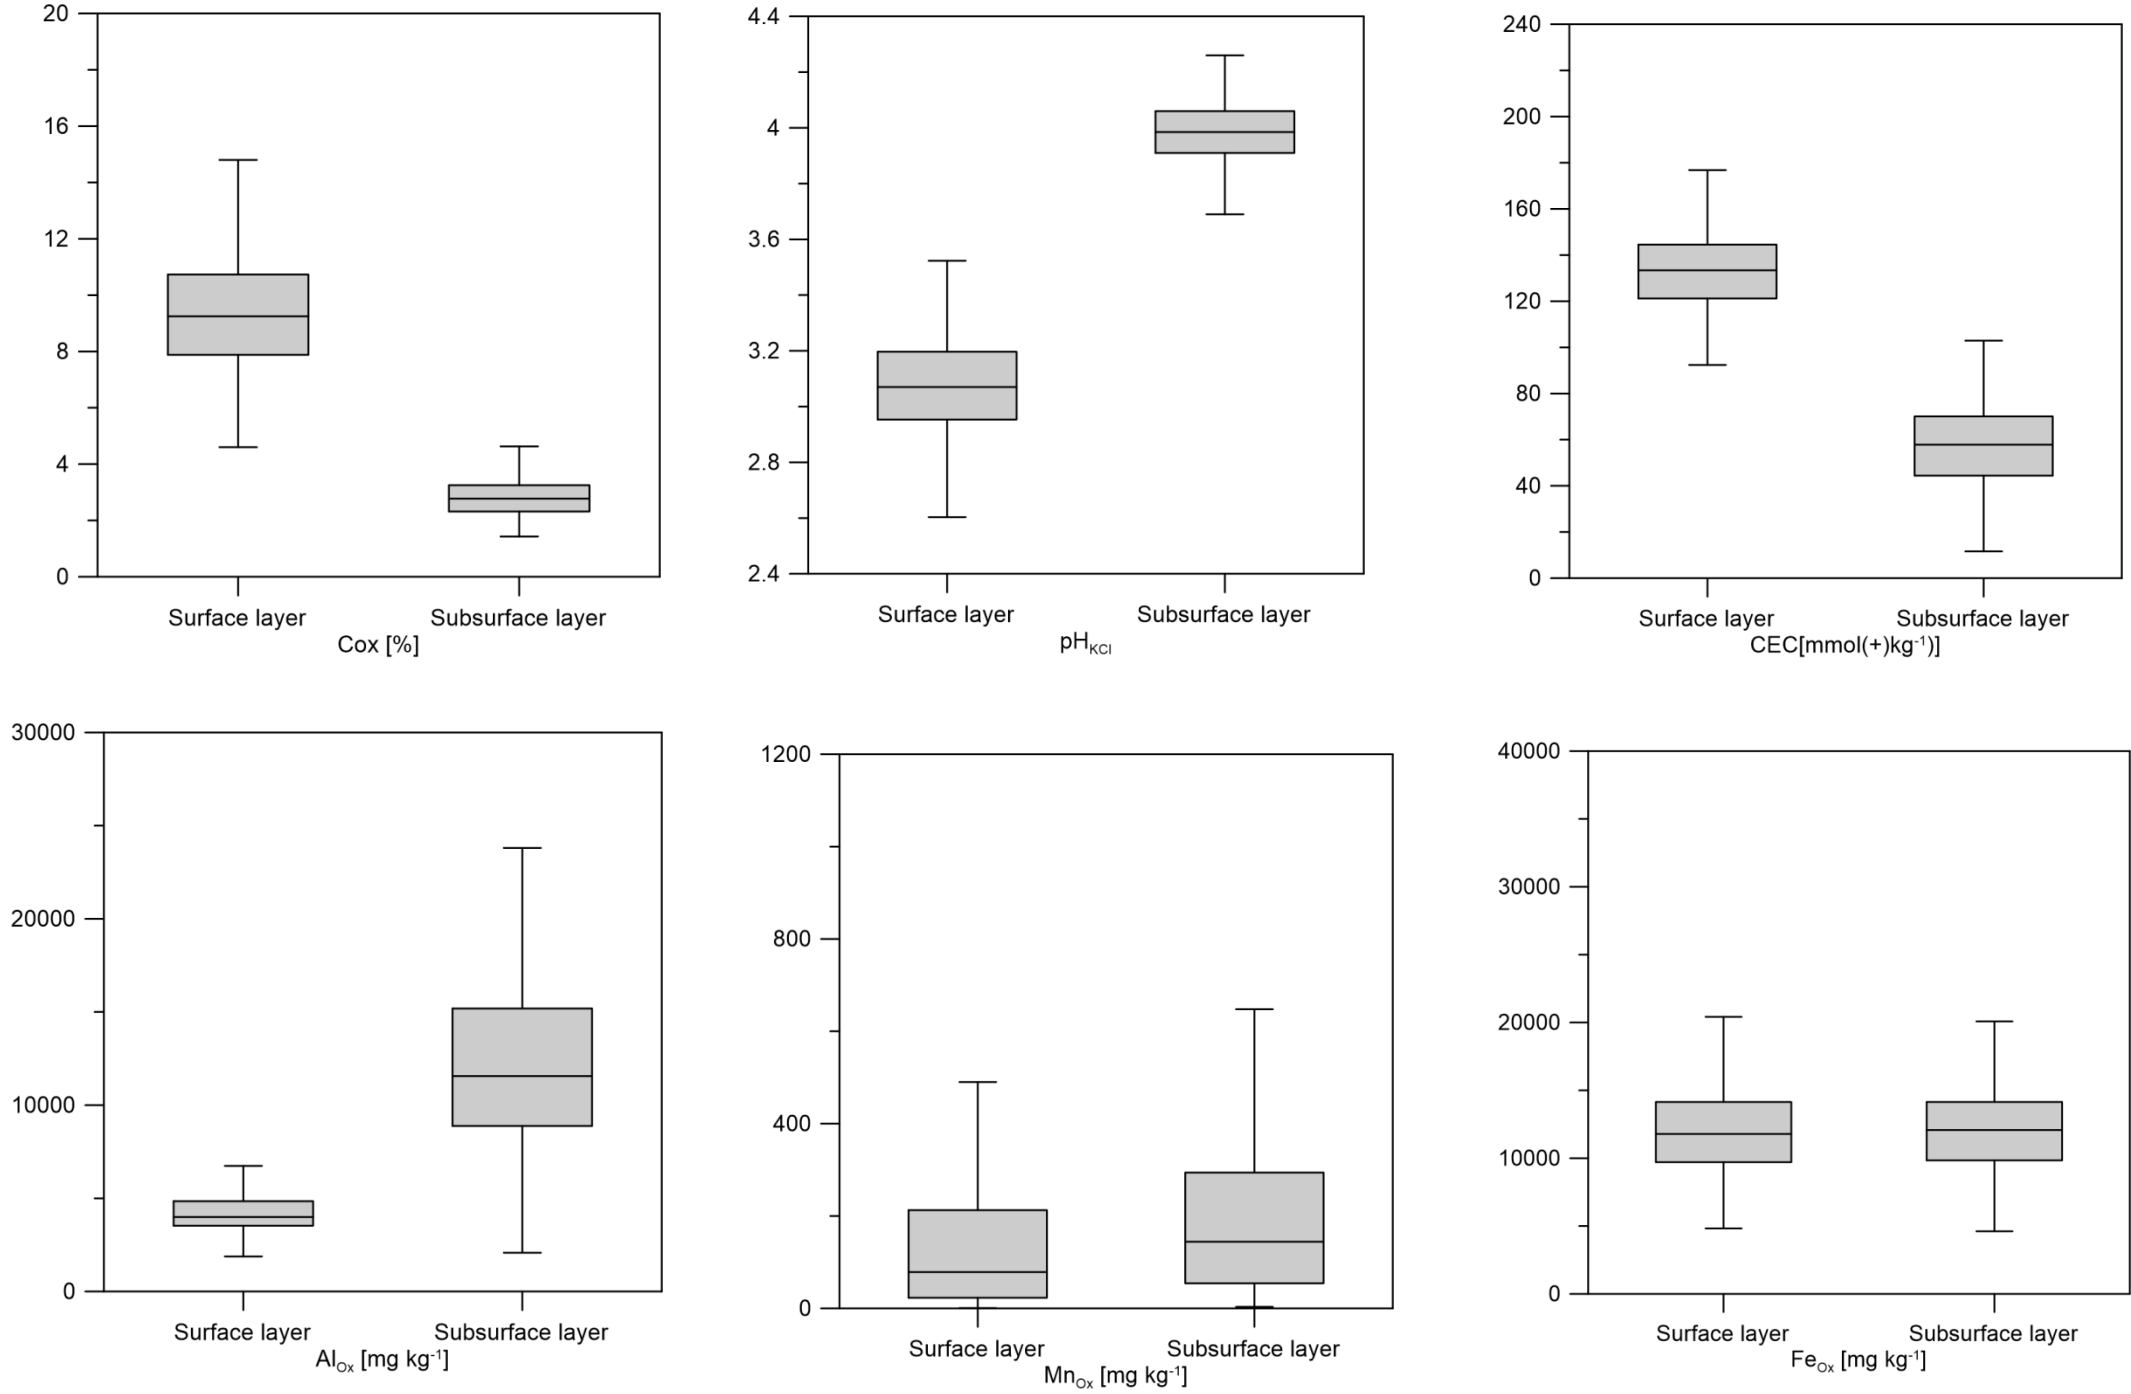



Figure S6

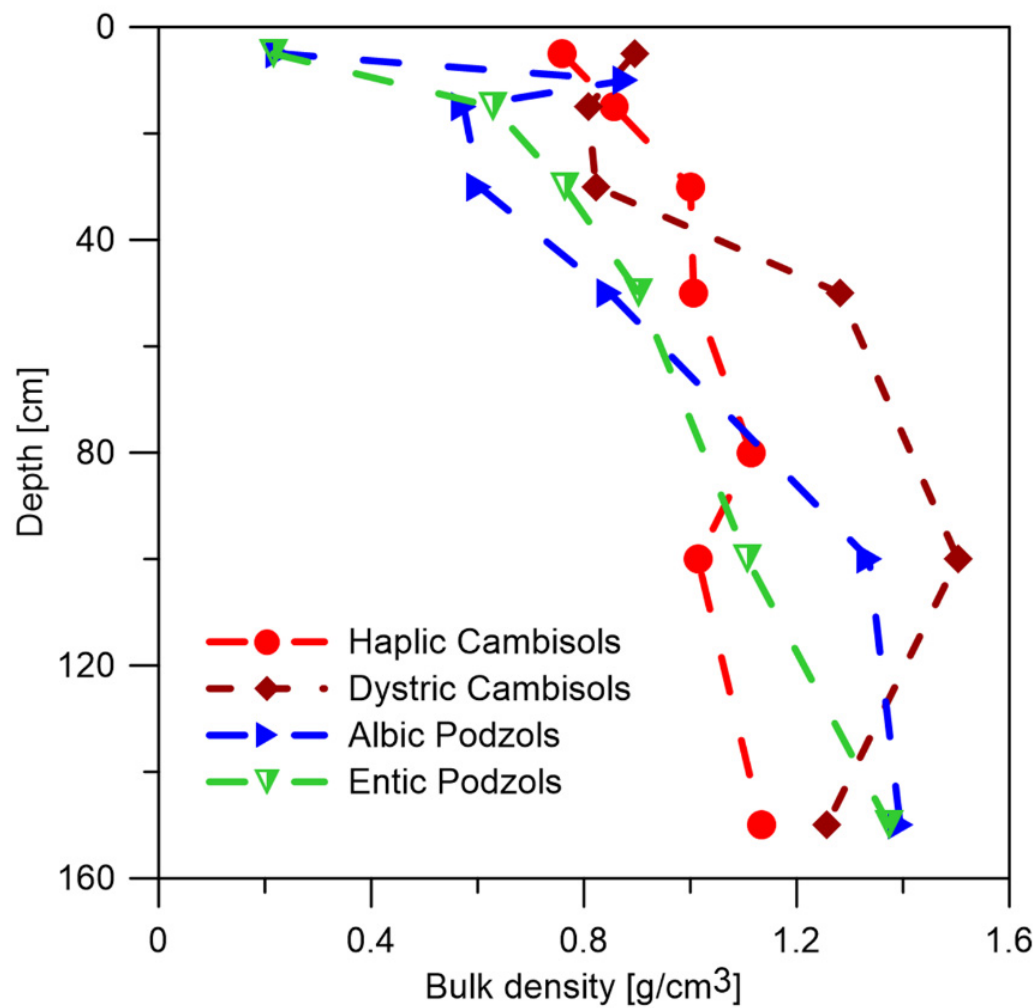

Figure S7

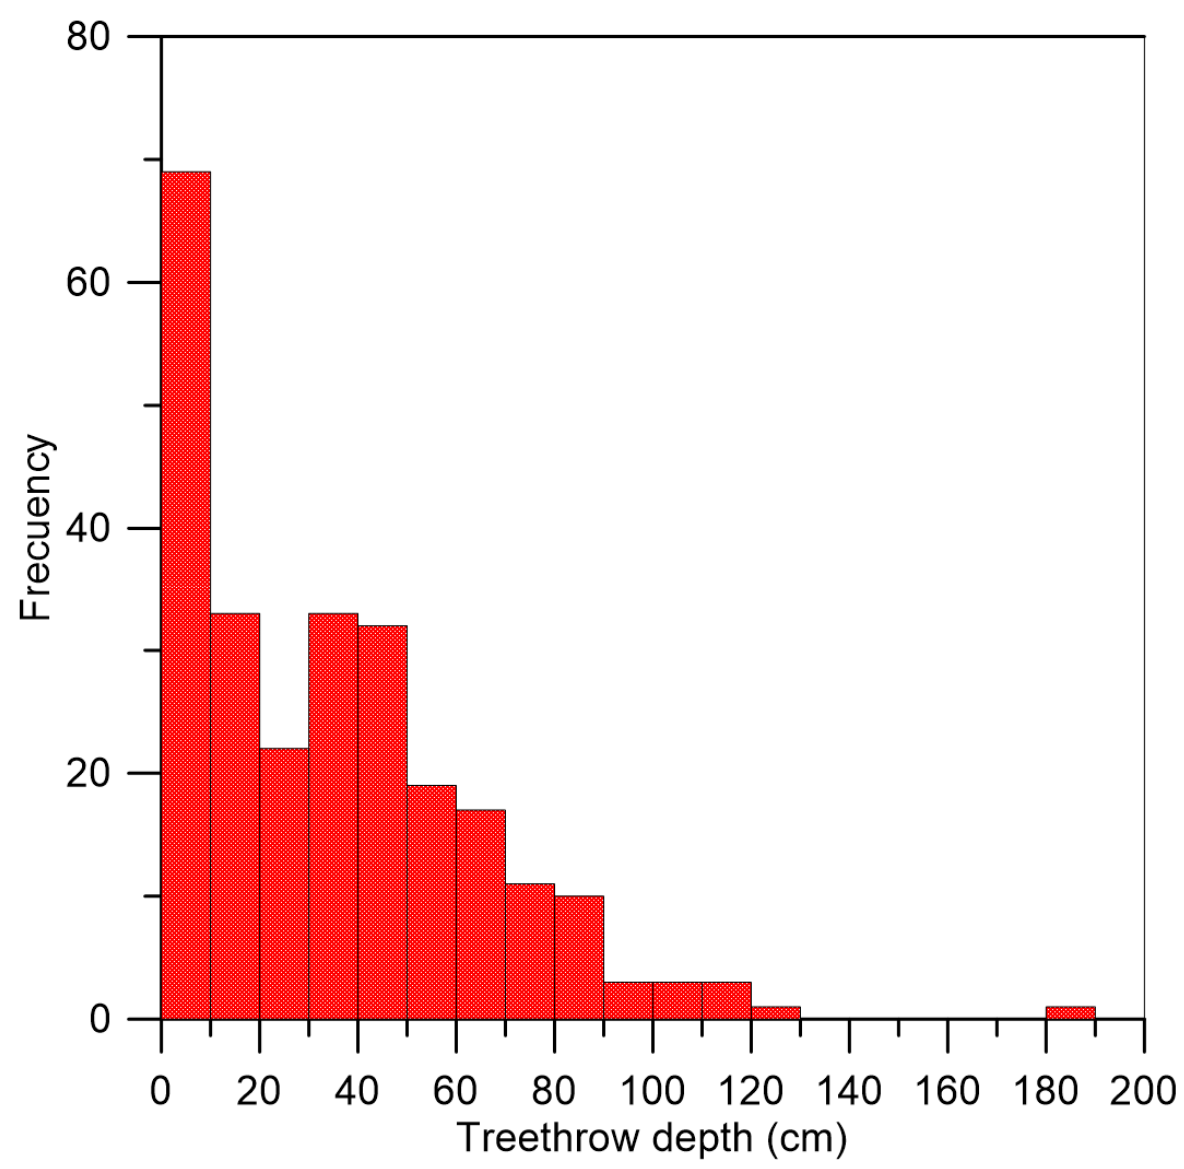

Figure S8

a) Totally decomposed treethrow

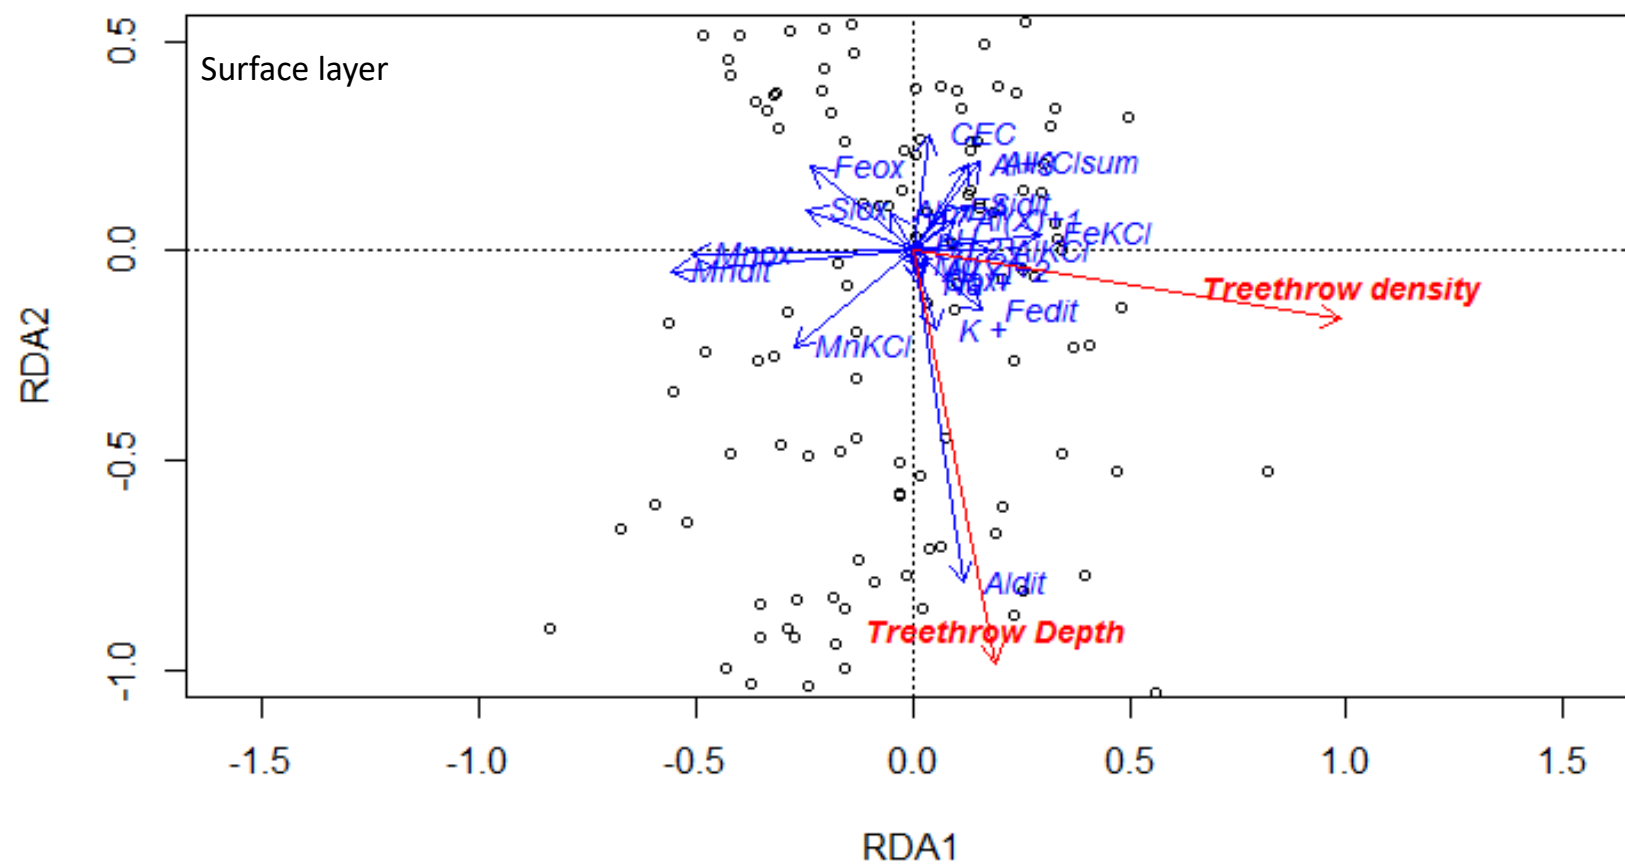

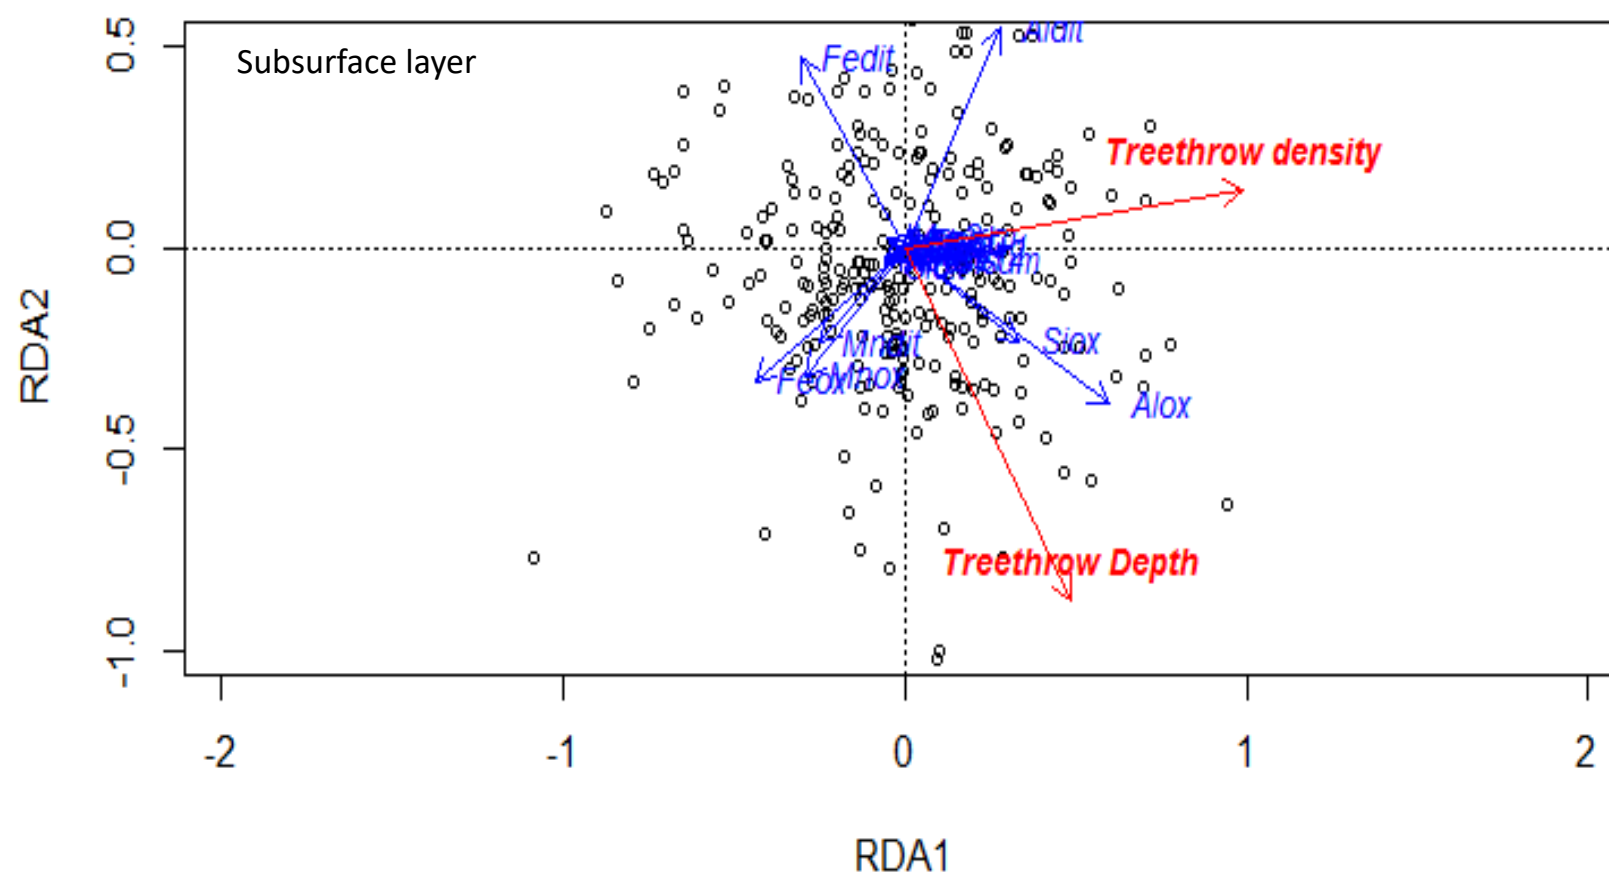

b)Partly decomposed treethrow

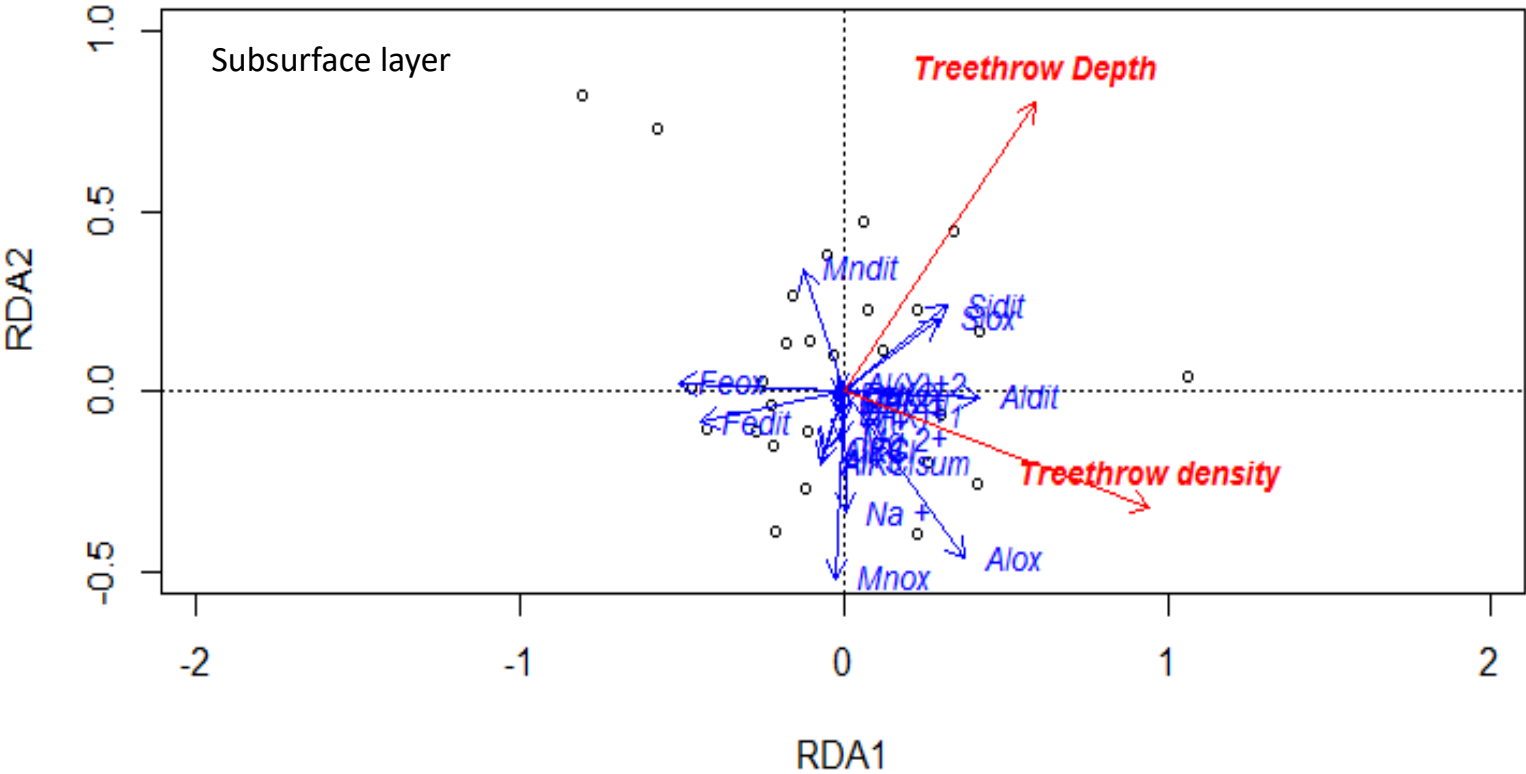

Supplement: s1 [file s1]
